# Supplementary material for: Characterization of FGF401 as a reversible covalent inhibitor of fibroblast growth factor receptor 4
Source: Royal Society of Chemistry journal article supplement (doi:10.1039/c9cc02052g), 2019-01-01
Supplement: c9cc02052g1.pdf [file c9cc02052g1.pdf]

## Supporting information for

### **Characterization of FGF401 as a reversible covalent inhibitor of fibroblast growth factor receptor 4**

Zhan Zhou,<sup>a</sup> Xiaojuan Chen,<sup>a</sup> Ying Fu,<sup>a</sup> Ye Zhang,<sup>a</sup> Shuyan Dai,<sup>a</sup> Jun Li,<sup>a</sup> Lin Chen,<sup>b</sup> Guangyu Xu,<sup>c</sup>  
Zhuchu Chen<sup>a</sup> and Yongheng Chen<sup>\*a</sup>

a. Key Laboratory of Cancer Proteomics of Chinese Ministry of Health & Laboratory of Structural Biology, Xiangya Hospital, Central South University, Changsha, Hunan, 410008, China

b. Molecular and Computational Biology Program, Department of Biological Sciences and Department of Chemistry, University of Southern California, Los Angeles, California 90089, United States

c. Key Laboratory of Chemical Biology and Traditional Chinese Medicine Research (Ministry of Education), College of Chemistry and Chemical Engineering, Hunan Normal University, Changsha 410081, China

\*Corresponding authors: Yongheng Chen, E-mail: yonghenc@163.com

## **Supplementary Methods**

### **Protein Expression and Purification**

The expression and purification procedure of the kinase domain of human FGFR4 was performed as previously described.<sup>1</sup> Briefly, the kinase domain of FGFR4 (residues 445–753) was cloned into modified pET28a (Soochoo Mix, TsingKe Co, Ltd., China) to construct the recombinant vector, which contains a PresCission protease-cleavable N-Terminal 6×His tag to aid in protein purification. The mutations (V550M, V550L, C552S, and C552A) were constructed using the QuikChange site-directed mutagenesis kit (Vazyme Biotech Co, Ltd., China). Co-expression with untagged YOPH provided the non-phosphorylated protein, FGFR4<sup>WT</sup>, and other corresponding mutations were purified by Ni-NTA affinity chromatography (GE Healthcare), PresCission protease cleavage to remove the 6×His tag, anion exchange chromatography (Mono Q) and size exclusion chromatography (GE Healthcare). The target proteins were collected and concentrated to about 10-15 mg/mL before being snap frozen in liquid nitrogen and stored at -80°C for biophysical studies.

### **MALDI-TOF MS**

The molecular weight of samples was assessed by matrix-assisted laser desorption/ionization time-of-flight mass spectrometry (MALDI-TOF MS) using  $\alpha$ -cyano-4-hydroxycinnamic acid as the matrix on Autoflex III (Bruker, USA). The operation mode was reflective mode with positive ion detection. The accelerating voltage was 19000 V and the delayed extraction time was 200 ns. Samples (0.2 mg/mL) were dissolved in Milli-Q™ water and then mixed with saturated matrix solution (CH<sub>3</sub>CN:H<sub>2</sub>O 1:1, v/v) at a volume ratio of 1:1.

### **Crystallization**

Inhibitors of FGF401, BLU9931, Ponatinib, and LY2874455 were purchased from Selleckchem (Huston, TX, USA). To generate FGFR4/FGF401 co-crystals, FGFR4 and FGF401 were mixed at a molar ratio of 1:2 on ice for overnight to allow the formation of covalent bonds between FGF401 and cysteine 552 in the kinase before crystallization. The FGFR4/FGF401 crystals were obtained at 4 °C using the hanging drop vapor diffusion method in a buffer composed of 0.1 M Tris-HCl pH 7.5, 20% PEG4K, 0.15 M (NH<sub>4</sub>)<sub>2</sub>SO<sub>4</sub>, and 4% (v/v) formamide. Crystals grew in about 3 days and were cryo protected in 0.1 M Tris-HCl pH 7.5, 20% PEG4K, 0.15 M (NH<sub>4</sub>)<sub>2</sub>SO<sub>4</sub>, and 4% (v/v) formamide plus 20% glycerol, and then flash frozen in liquid nitrogen for data collection.

### **X-ray data collection, data processing and structures solution**

Diffraction data were collected both in our lab and at Shanghai Synchrotron Radiation Facility (SSRF), beamline BL17U. The diffraction data was processed using the HKL3000. Crystal structure was solved by molecular replacement with Phaser from the CCP4 package, using the previously solved FGFR4/LY2874455 structure (PDB: 5JKG) as the search model. Model building was carried out using Coot, and refinements were operated using phenix.refine in the PHENIX package. Data collection and structure refinement statistics are listed in Table S2. Structural graphics were presented by PyMOL. Atomic coordinates and structure factors for the reported crystal structures have been deposited with the Protein Data bank under accession number 6JPJ.

### **Kinase Inhibition Assay**

All FGFR kinase inhibition assays were performed with optimized kinase assay buffer consisting of 40 mM Tris-HCl pH 7.5, 20 mM MgCl<sub>2</sub>, 20 mM NaCl, 0.1 mg/mL BSA, 1 mM TCEP, and 4% DMSO. Five microliter of FGFR4 proteins (0.1 μM) were treated with FGF401 and LY2874455 inhibitor (12 concentrations ranging from 25 μM to 0.01 nM, in duplicate) in 384-well plates. Then the kinase reactions were initiated by the addition of 5×ATP plus poly (4:1 Glu, Tyr) peptides (Abcam, UK) and incubated at room temperature for 30 min. All reactions were terminated by the addition of stop buffer ADP-Glo (Promega, USA) after 40 min of incubation. Inhibition data were collected on a multimode plate reader (Perkin Elmer) after the addition of detection reagent. IC<sub>50</sub> values were fit with a four-parameter log[Inhibitor] versus response model using GraphPad Prism software.

### **Ba/F3 Cell-Viability Assay**

Ba/F3 cell (Cell Resource Center, IBMS, CAMS, China) viability assays were performed as previously described.<sup>2, 3</sup> Viral supernatants were collected and used to infect Ba/F3 cells in the presence of IL-3. After infection, the infected Ba/F3 cells were washed twice with PBS to remove IL-3, and then screened by puromycin. After one week screening, the Ba/F3 cell transfectants were used to test the inhibitor potency. Ba/F3 cell transfectants were seeded in 96-cell plates and treated with the indicated concentrations of the FGF401 and LY2874455 (12 concentrations ranging from 1000 nM to 0.01 nM, in duplicate). After 72 h incubation, cell viability was assessed by MTS assay using cck-8 kit (Sigma-Aldrich, USA). The IC<sub>50</sub> values were calculated using

GraphPad Prism software.

### **Dialysis of FGFR4 after treatment with FGF401**

FGFR4 (200 nM) was first activated in the kinase assay buffer consisting of 40 mM Tris-HCl pH 7.5, 20 mM MgCl<sub>2</sub>, 20 mM NaCl, 0.1 mg/mL BSA, 1 mM TCEP, and 4% DMSO, and then treated with 4 μM inhibitors for 60 min at room temperature. The reactions were transferred to a dialysis cassette (1 mL, 3 kDa MWCO) and dialysis in 1 L of kinase assay buffer at 4 °C. Buffer was removed every 24 h during the experiment time of 4 days. Fifty milliliter aliquots were removed each day for kinase assays and FGFR4 activity was determined using the kinase assay as described above.

### **References**

1. D. Wu, M. Guo, M. A. Philips, L. Qu, L. Jiang, J. Li, X. Chen, Z. Chen, L. Chen and Y. Chen, *PLoS one*, 2016, **11**, e0162491.
2. D. Wu, M. Guo, X. Min, S. Dai, M. Li, S. Tan, G. Li, X. Chen, Y. Ma, J. Li, L. Jiang, L. Qu, Z. Zhou, Z. Chen, L. Chen, G. Xu and Y. Chen, *Chem Commun (Camb)*, 2018, **54**, 12089-12092.
3. J. S. Melnick, J. Janes, S. Kim, J. Y. Chang, D. G. Sipes, D. Gunderson, L. Jarnes, J. T. Matzen, M. E. Garcia, T. L. Hood, R. Beigi, G. Xia, R. A. Harig, H. Asatryan, S. F. Yan, Y. Zhou, X. J. Gu, A. Saadat, V. Zhou, F. J. King, C. M. Shaw, A. I. Su, R. Downs, N. S. Gray, P. G. Schultz, M. Warmuth and J. S. Caldwell, *Proceedings of the National Academy of Sciences of the United States of America*, 2006, **103**, 3153-3158.

**Supplementary Tables and Figures****Table S1.** Selectivity and potency of LY2874455 and FGF401 against wild-type FGFR1-4 in kinase assay and Ba/F3 assay.

| Kinase/inhibitor | Kinase assay (nM) |        | Ba/F3 assay (nM) |        |
|------------------|-------------------|--------|------------------|--------|
|                  | LY2874455         | FGF401 | LY2874455        | FGF401 |
| FGFR1            | 0.6               | >10000 | 18.9             | >1000  |
| FGFR2            | 0.6               | >10000 | N.A              | N.A    |
| FGFR3            | 2.3               | >10000 | N.A              | N.A    |
| FGFR4            | 5.6               | 6.2    | 24.6             | 37.0   |

**Table S2.** Data collection and refinement statistics.

|                              | FGFR4/FGF401 Complex                       |
|------------------------------|--------------------------------------------|
| Wavelength (Å)               | 1.54                                       |
| Resolution range (Å)         | 41.8 - 2.64 (2.73 - 2.64)                  |
| Space group                  | <i>P</i> 2 <sub>1</sub>                    |
| Unit cell                    | 42.28, 60.93, 61.15<br>90.00, 98.56, 90.00 |
| Total reflections            | 53200 (2433)                               |
| Unique reflections           | 8724 (589)                                 |
| Multiplicity                 | 6.1 (4.1)                                  |
| Completeness (%)             | 95.25 (67.78)                              |
| Mean I/sigma(I)              | 14.36 (5.82)                               |
| Wilson B-factor              | 33.05                                      |
| R-merge                      | 0.08 (0.18)                                |
| R-meas                       | 0.088                                      |
| CC1/2                        | 0.997 (0.984)                              |
| CC*                          | 0.999 (0.996)                              |
| R-work                       | 0.195 (0.275)                              |
| R-free                       | 0.243 (0.301)                              |
| Number of non-hydrogen atoms | 2444                                       |
| macromolecules               | 2389                                       |
| ligands                      | 10                                         |
| Protein residues             | 299                                        |
| RMS (bonds)                  | 0.008                                      |
| RMS (angles)                 | 0.84                                       |
| Ramachandran favored (%)     | 97                                         |
| Ramachandran outliers (%)    | 0                                          |
| Clashscore                   | 3.58                                       |
| Average B-factor             | 38.30                                      |
| macromolecules               | 38.40                                      |
| ligands                      | 52.90                                      |

|          |            |
|----------|------------|
| FGFR4    | PLYVIVECAA |
| MAPKAPK2 | CLLIVMECLD |
| MAPKAPK3 | CLLIIMECME |
| CHAK1    | QWFAVEECM- |
| PI4K     | PGCGVIECIP |
| P70S6Kb  | KLYLILECLS |
| TTK      | YIYMVMECG- |

**Figure S1.** Kinases with a cysteine at the equivalent position of Cys552 in FGFR4 within the human kinome.

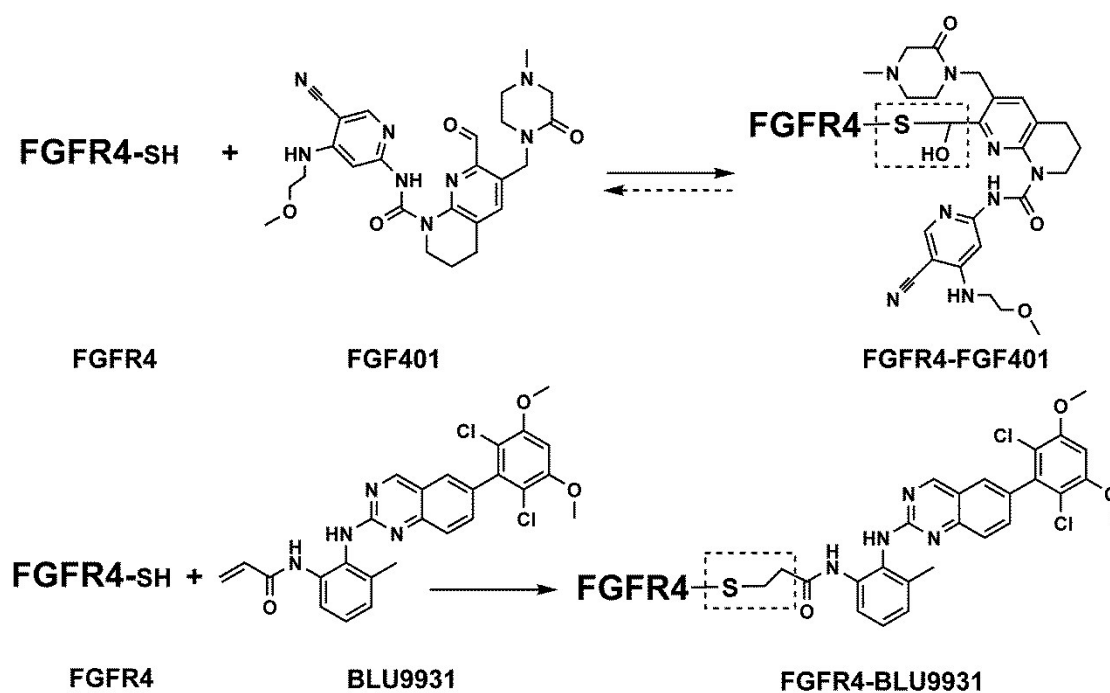

**Figure S2.** The covalent coupling reaction of FGF401 and BLU9931 to FGFR4. The putative electrophile aldehyde group of FGF401 binds to the free thiol group of FGFR4 Cys552 in a reversible-covalent manner through the formation of a hemithioacetal, whereas the conjugate double bond of BLU9931 reacts with the free thiol group of FGFR4 Cys552 by forming an irreversible covalent linkage through a Michael addition reaction.



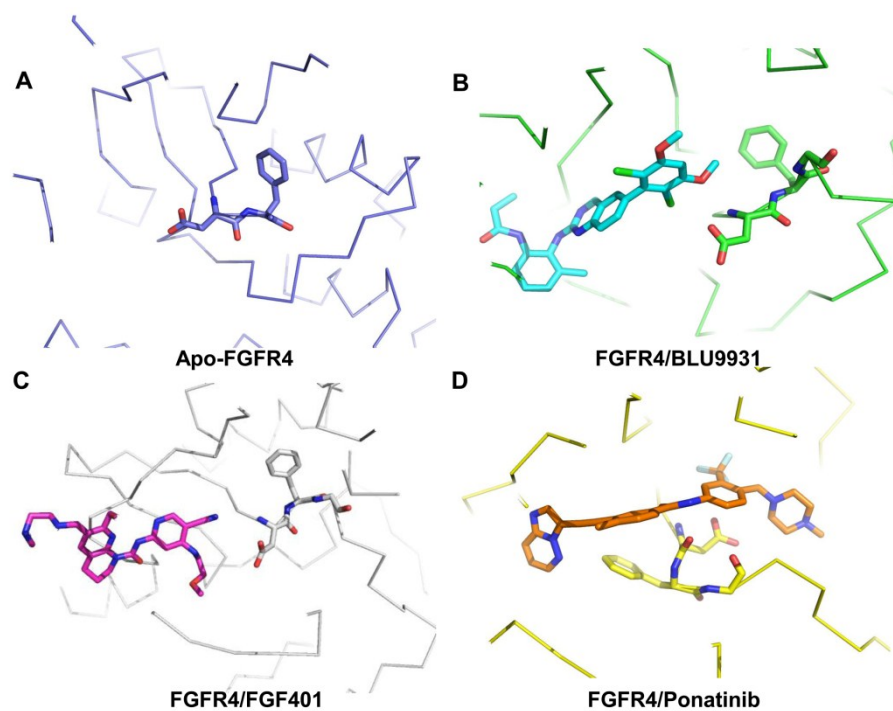

**Figure S3.** The DFG motif conformation of FGFR4. (A) Active Apo-FGFR4 DFG-in conformation (PDB: 4QQT). (B) Active FGFR4 DFG-in conformation in FGFR4/BLU9931 complex (PDB: 4XCU). (C) Active FGFR4 DFG-in conformation in FGFR4/FGF401 complex (this work, PDB: 6JPJ). (D) Inactive FGFR4 DFG-out conformation in FGFR4/Ponatinib complex (PDB: 4UXT).
